# Supplementary material
Source: PubMed Central journal article supplement (PMC3811422)
Supplement: AAC.00477-13_zac010132183so1.pdf [file AAC.00477-13_zac010132183so1.pdf]

**Supplementary Table 1.- Oligonucleotides used for PCR amplification and sequencing of *ERG11* and *ERG3* genes.**

| Name                           | 5' - 3'   | Sequences               | Use given                        | Reference* |
|--------------------------------|-----------|-------------------------|----------------------------------|------------|
| <i>Erg3 PCR amplification</i>  |           |                         |                                  |            |
| ERG3F1                         | sense     | TGGATATCGTTCTTGAAAT TTG | PCR amplification and sequencing | This work  |
| ERG3R1                         | antisense | AACTGGAATGGCTCTAGTTG    | Erg3 sequencing                  | This work  |
| ERG3F2                         | sense     | TCTTATCCCTTTTCATAGTTAC  | Erg3 sequencing                  | This work  |
| ERG3R2                         | antisense | CCAATAATTACCATCATGAATC  | Erg3 sequencing                  | This work  |
| ERG3F3                         | sense     | TGCTTTCCATCCAGTTGATG    | Erg3 sequencing                  | This work  |
| ERG3R3                         | antisense | GTCATCAACTTTACCTTCAAG   | PCR amplification and sequencing | This work  |
| <i>Erg11 PCR amplification</i> |           |                         |                                  |            |
| ERG11F1                        | sense     | TCTGACATGGTGTGTGTGTG    | PCR amplification and sequencing | [1]        |
| ERG11R1                        | antisense | ATTGATGCCATCAATGGCAG    | Erg11 sequencing                 | [1]        |
| ERG11F2                        | sense     | ATCCCACAGGCTTATTTGAAA   | Erg11 sequencing                 | [1]        |
| ERG11R2                        | antisense | GGTCTCTTTCCTTGGTTTTG    | Erg11 sequencing                 | [1]        |
| ERG11F3                        | sense     | TGCTGAAGAAGCTTATACCC    | Erg11 sequencing                 | [1]        |
| ERG11R3                        | antisense | CAAGGAATCAATCAAATCTCTC  | Erg11 sequencing                 | [1]        |
| ERG11F4                        | sense     | GGTGGTCAACATACTTCTGC    | Erg11 sequencing                 | [1]        |
| ERG11R4                        | antisense | AGCAGGTTCTAATGGTAAGG    | Erg11 sequencing                 | [1]        |
| ERG11F5                        | sense     | AAACGGTGATAAGGTTCCAG    | Erg11 sequencing                 | [1]        |
| ERG11R5                        | antisense | TCCCAAGACATCAAACCCTG    | Erg11 sequencing                 | [1]        |
| ERG11R5b                       | antisense | TGCGGTACAGGTGATCTGTG    | PCR amplification and sequencing | This work  |

\*[1] Vandeputte P, Larcher G, Bergès T, Renier G, Chabasse D, Bouchara JP. 2005. Mechanisms of azole resistance in a clinical isolate of *Candida tropicalis*. *Antimicrob. Agents Chemother.* 49:4608-4615.



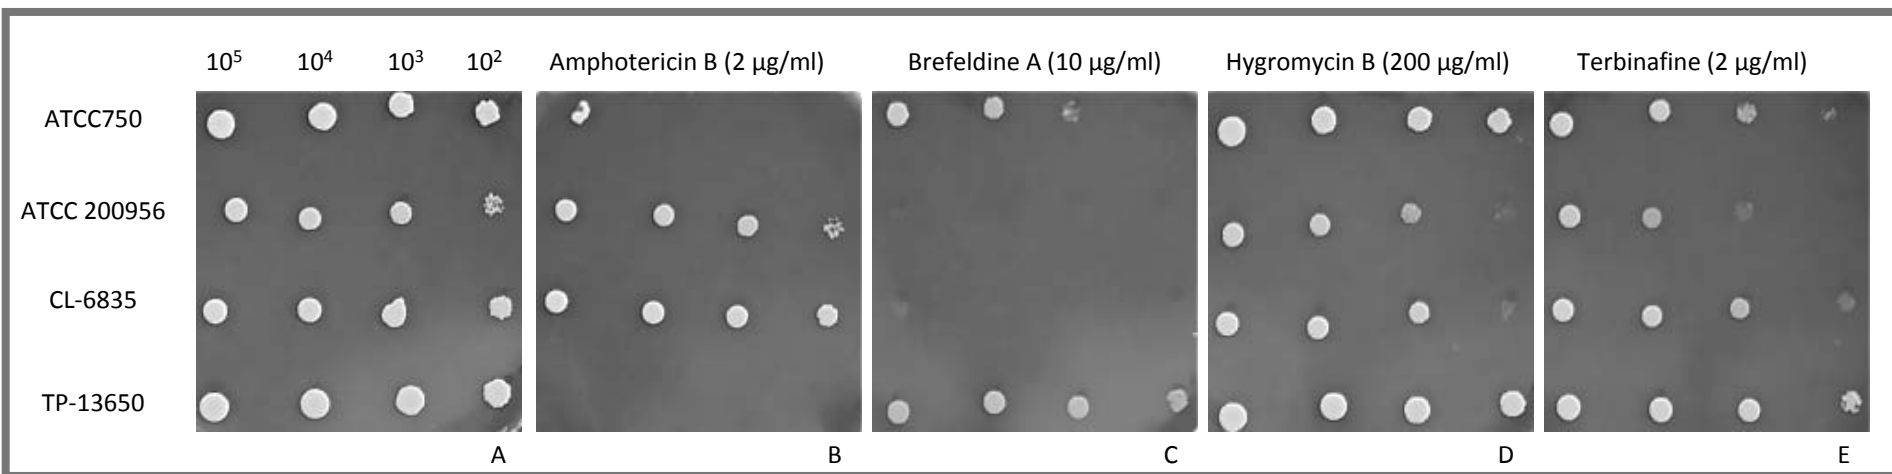

**S2\_Figure 2. Metabolic inhibitors susceptibility assays.** Serial dilutions of *C. tropicalis* susceptible and resistant to azoles (ATCC750 and TP-13650) and *C. tropicalis* with cross-resistance to azole drugs and AmB (ATCC200956 and CL-6835) were spotted onto the agar plates containing the different drugs at the indicated concentrations (B, C, D and E). A drug-free YNB medium was included as control (A). The plates were incubated for 48 h at 37°C.

A)

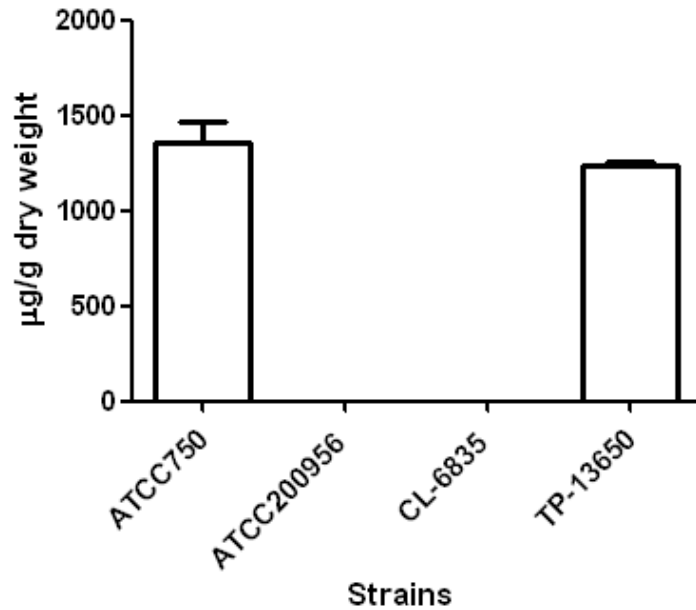

B)

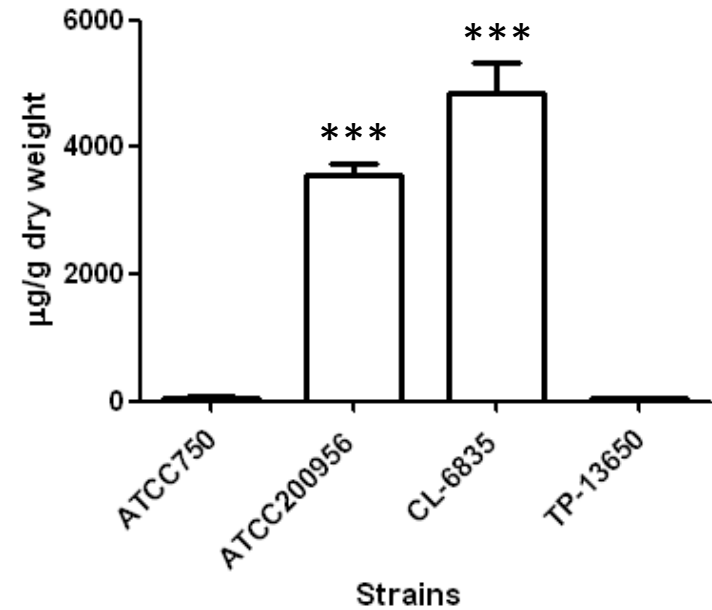

**S3\_Figure 3.-** Total amount of ergosterol (A) and 14-methyl sterols (B). Ergosterol was found in ATCC750 and TP-13650 strains (A). *Candida tropicalis* strains with cross-resistance to azole drugs and AmB, ATCC200956 and CL-6835, presented mostly 14-methyl sterols (B). C-14 methylated sterols were composed of 14-methyl fecosterol, 4,14-dimethylcholesta-8,24-dien-3 $\beta$ -ol, lanosterol and eburicol. \*\*\*p <0,0001.

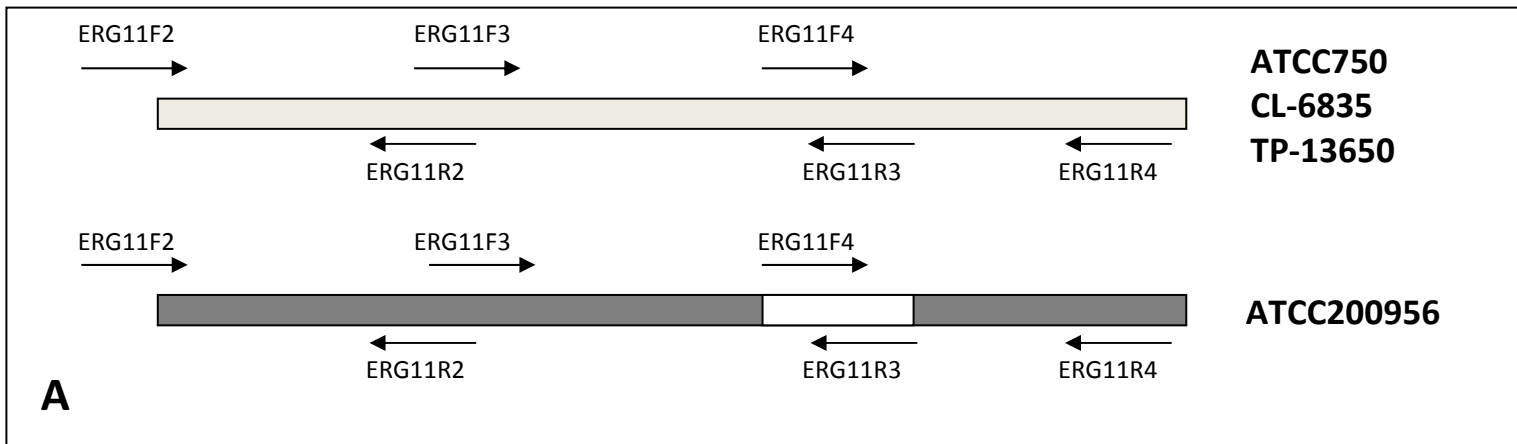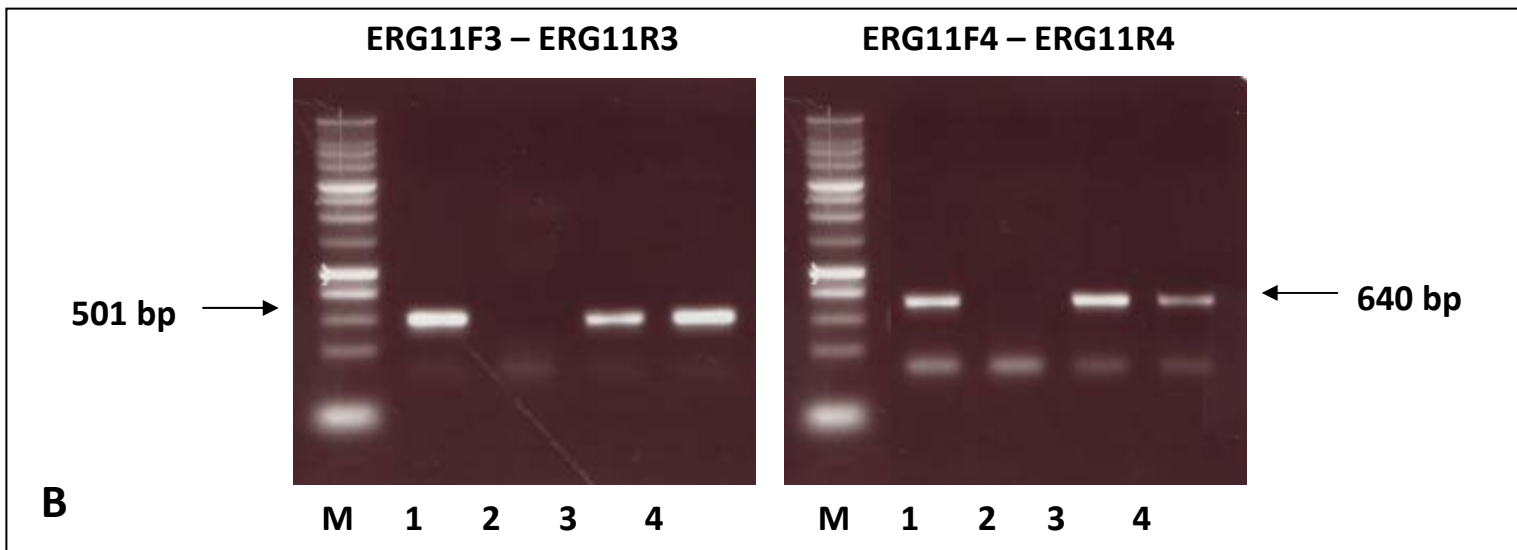

**S4\_Figure 4. Agarose gel electrophoresis of amplified PCR products of *CtERG11*.** (A) Forward and reverse primers (PF3 + PR3, PF4 + PR4) (Supplementary Table 1) were used to amplify a specific region of *CtERG11* sequence where the *ERG11* gene deletion was located. (B) Lane 1: ATCC750, lane 2: ATCC200956, lane 3: CL-6835 and lane 4: TP-13650. Lane M: marker ( 1 Kb Ladder).

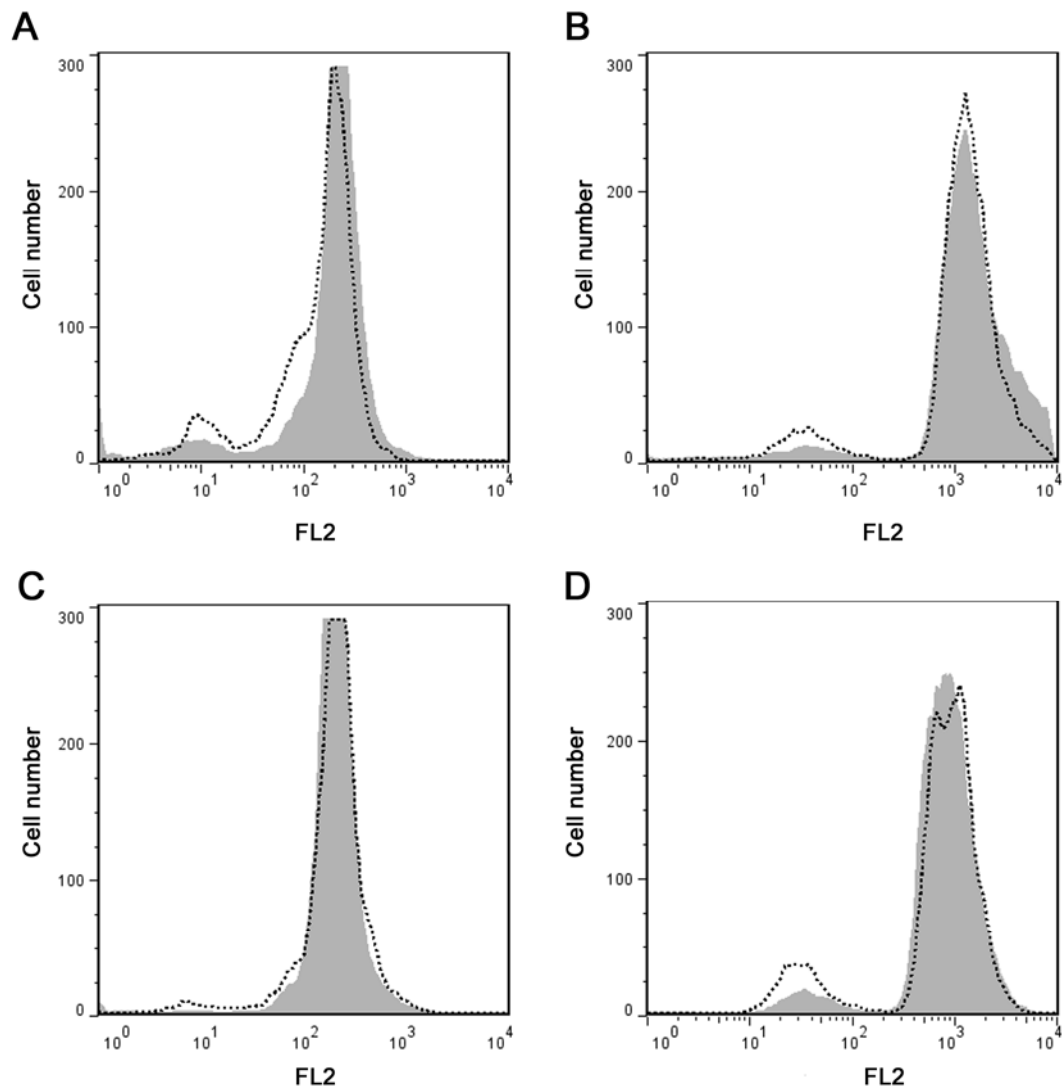

**S5\_Figure 5.** Flow cytometric quantification of Rhodamine 6G (R6G) uptake and efflux in *C. tropicalis*. Yeast cells ( $10^7$ ) were incubated with R6G ( $10\ \mu\text{M}$ ) in YEPD for 30 min at  $30^\circ\text{C}$ , in constant shaking. Fluorescence intensity was quantified after washing with PBS (grey area). Fluorescence intensity was newly quantified (black line) following a further incubation in YEPD. A) ATCC750, B) ATCC200956, C) TP-13650, D) CL-6835.
